# Supplementary material for: Effect of Space Flight on the Behavior of Human Retinal Pigment Epithelial ARPE-19 Cells and Evaluation of Coenzyme Q10 Treatment
Source: Research Square preprint supplement (doi:10.21203/rs.3.rs-675406/v1), 2021-07-14
Supplement: Supplementary file 1 [file 4a03fc50e323ce4390e70db4.xlsx]

## Sheet: Foglio1
GO - Biological Processes								GO - Molecular Functions								GO - Cellular Components
Identifier	Description	Count DE	Count All	p-value	p-value (FDR)	p-value (Bonferroni)		Identifier	Description	Count DE	Count All	p-value	p-value (FDR)	p-value (Bonferroni)		Identifier	Description	Count DE	Count All	p-value	p-value (FDR)	p-value (Bonferroni)
GO:0034976	response to endoplasmic reticulum stress	125	261	1.1e-11	0.0129008	0.0129008		GO:0043167	ion binding	1715	5615	2.5e-06	0.007335	0.007335		GO:0005783	endoplasmic reticulum	616	1615	2.4e-20	3.3336e-13	3.3336e-13
GO:0034620	cellular response to unfolded protein	72	130	7.4e-11	0.0433936	0.0867872		GO:0005509	calcium ion binding	217	610	4.6e-05	1	1		GO:0044432	endoplasmic reticulum part	463	1173	2.1e-18	1.45845e-10	2.9169e-11
GO:0006986	response to unfolded protein	86	167	1.8e-10	0.0070368	2.11104e-06		GO:0004576	oligosaccharyl transferase activity	9	10	8.8e-05	1	1		GO:0098827	endoplasmic reticulum subcompartment	372	931	7.6e-16	3.15998e-07	1.05564e-07
GO:0035967	cellular response to topologically incorrect protein	77	147	5.8e-10	1.70056e-06	6.80224e-06		GO:0003777	microtubule motor activity	39	81	0.00012	1	1		GO:0031984	organelle subcompartment	554	1489	9.1e-16	3.15998e-07	1.26399e-07
GO:0030968	endoplasmic reticulum unfolded protein response	67	123	8.7e-10	2.04067e-06	1.02034e-05		GO:0043168	anion binding	784	2509	0.00026	1	1		GO:0005789	endoplasmic reticulum membrane	370	928	1.3e-15	3.6114e-09	1.8057e-08
GO:0006890	retrograde vesicle-mediated transport, Golgi to ER	49	81	1.4e-09	2.73653e-06	1.64192e-05		GO:0004579	dolichyl-diphosphooligosaccharide-protein glycotransferase activity	8	9	0.00028	1	1		GO:0042175	nuclear outer membrane-endoplasmic reticulum membrane network	375	947	2.9e-15	6.7135e-09	4.0281e-08
GO:0035966	response to topologically incorrect protein	91	186	1.7e-09	2.84823e-06	1.99376e-05		GO:0036094	small molecule binding	702	2245	0.00054	1	1		GO:0012505	endomembrane system	1278	3926	1.2e-12	23811.4	1.6668e-05
GO:0048193	Golgi vesicle transport	140	321	2.3e-09	3.3718e-06	2.69744e-05		GO:0004714	transmembrane receptor protein tyrosine kinase activity	28	57	0.00071	1	1		GO:0044444	cytoplasmic part	2574	8593	1.5e-08	2.60437e-06	2.0835e-05
GO:0006888	ER to Golgi vesicle-mediated transport	86	175	3.6e-09	4.6912e-06	4.22208e-05		GO:0019838	growth factor binding	51	121	0.00076	1	1		GO:0005798	Golgi-associated vesicle	71	143	3.8e-08	5.4171e-06	5.2782e-05
GO:0010033	response to organic substance	868	2675	1e-07	0.00011728	0.0011728		GO:0003756	protein disulfide isomerase activity	12	18	0.00082	1	1		GO:0005737	cytoplasm	3040	10291	3.9e-08	5.4171e-06	5.4171e-05
GO:0071310	cellular response to organic substance	711	2153	1.1e-07	0.00011728	0.00129008		GO:0016864	intramolecular oxidoreductase activity, transposing S-S bonds	12	18	0.00082	1	1		GO:0030662	coated vesicle membrane	72	148	8.8e-08	1.1112e-05	0.000122232
GO:0006793	phosphorus metabolic process	953	2998	1.4e-06	0.00135323	0.0164192		GO:0046527	glucosyltransferase activity	11	16	0.00093	1	1		GO:0030134	COPII-coated ER to Golgi transport vesicle	39	66	1.4e-07	1.60269e-05	0.00019446
GO:0006901	vesicle coating	36	63	1.5e-06	0.00135323	0.017592		GO:0019842	vitamin binding	51	122	0.00095	1	1		GO:0005794	Golgi apparatus	471	1377	1.5e-07	1.60269e-05	0.00020835
GO:0048199	vesicle targeting, to, from or within Golgi	37	67	3.3e-06	0.00265835	0.0387024		GO:0019199	transmembrane receptor protein kinase activity	33	72	0.00117	1	1		GO:0005793	endoplasmic reticulum-Golgi intermediate compartment	54	104	2.5e-07	2.48036e-05	0.00034725
GO:0048194	Golgi vesicle budding	39	72	3.4e-06	0.00265835	0.0398752		GO:0017076	purine nucleotide binding	554	1760	0.00119	1	1		GO:0030660	Golgi-associated vesicle membrane	49	92	3.2e-07	2.9632e-05	0.00044448
GO:0070887	cellular response to chemical stimulus	830	2600	4.1e-06	0.0030053	0.0480848		GO:0097367	carbohydrate derivative binding	627	2007	0.00122	1	1		GO:0030135	coated vesicle	103	239	4.4e-07	3.81975e-05	0.00061116
GO:0048731	system development	1244	4012	4.9e-06	0.00338042	0.0574672		GO:0046872	metal ion binding	1142	3771	0.00135	1	1		GO:0044425	membrane part	1718	5635	5.8e-07	4.73894e-05	0.00080562
GO:0048207	vesicle targeting, rough ER to cis-Golgi	34	61	6.1e-06	0.00375296	0.0715408		GO:0032555	purine ribonucleotide binding	549	1748	0.00155	1	1		GO:0012507	ER to Golgi transport vesicle membrane	29	47	1.6e-06	0.000123467	0.0022224
GO:0048208	COPII vesicle coating	34	61	6.1e-06	0.00375296	0.0715408		GO:0016491	oxidoreductase activity	224	668	0.00159	1	1		GO:0000139	Golgi membrane	243	670	1.8e-06	0.000131589	0.0025002
GO:0006903	vesicle targeting	42	81	6.4e-06	0.00375296	0.0750592		GO:0000166	nucleotide binding	614	1969	0.00166	1	1		GO:0030126	COPI vesicle coat	12	13	2.3e-06	0.000159735	0.0031947
GO:0051179	localization	1725	5686	7.7e-06	0.00430027	0.0903056		GO:0032553	ribonucleotide binding	552	1760	0.00171	1	1		GO:0016020	membrane	2349	7906	5.6e-06	0.0003704	0.0077784
GO:0036498	IRE1-mediated unfolded protein response	36	67	1e-05	0.00533091	0.11728		GO:1901265	nucleoside phosphate binding	614	1970	0.00174	1	1		GO:0016021	integral component of membrane	1361	4438	5.9e-06	0.000372505	0.0081951
GO:0006796	phosphate-containing compound metabolic process	918	2915	1.2e-05	0.00611896	0.140736		GO:0016717	oxidoreductase activity, acting on paired donors, with oxidation of a pair of donors resulting in the reduction of molecular oxygen to two molecules of water	5	5	0.00183	1	1		GO:0098791	Golgi subcompartment	264	749	8.3e-06	0.000497725	0.0115287
GO:0090114	COPII-coated vesicle budding	35	65	1.3e-05	0.00635267	0.152464		GO:0030554	adenyl nucleotide binding	455	1440	0.00245	1	1		GO:0044431	Golgi apparatus part	298	858	8.6e-06	0.000497725	0.0119454
GO:0032879	regulation of localization	745	2334	1.5e-05	0.0070368	0.17592		GO:0032559	adenyl ribonucleotide binding	451	1430	0.00296	1	1		GO:0098588	bounding membrane of organelle	598	1844	9.1e-06	0.000505596	0.0126399
GO:0006900	vesicle budding from membrane	43	86	1.6e-05	0.00721723	0.187648		GO:0035639	purine ribonucleoside triphosphate binding	534	1710	0.00299	1	1		GO:0030663	COPI-coated vesicle membrane	13	16	1.5e-05	0.000801346	0.020835
GO:0070059	intrinsic apoptotic signaling pathway in response to endoplasmic reticulum stress	31	56	1.9e-05	0.00825304	0.222832		GO:0035251	UDP-glucosyltransferase activity	7	9	0.003	1	1		GO:0033116	endoplasmic reticulum-Golgi intermediate compartment membrane	33	61	1.7e-05	0.000874556	0.023613
GO:0033002	muscle cell proliferation	72	167	2.7e-05	0.0109192	0.316656		GO:0043169	cation binding	1155	3843	0.00372	1	1		GO:0031224	intrinsic component of membrane	1386	4552	2.3e-05	0.00114096	0.031947
GO:0098742	cell-cell adhesion via plasma-membrane adhesion molecules	88	213	2.7e-05	0.0109192	0.316656		GO:0051184	cofactor transporter activity	11	18	0.00374	1	1		GO:0030137	COPI-coated vesicle	16	23	4.4e-05	0.00210745	0.061116
GO:0006520	cellular amino acid metabolic process	133	347	2.8e-05	0.0109461	0.328384		GO:0005524	ATP binding	440	1398	0.00389	1	1		GO:0005788	endoplasmic reticulum lumen	106	271	5.4e-05	0.0025002	0.075006
GO:0007275	multicellular organism development	1372	4491	3.4e-05	0.012863	0.398752		GO:0048029	monosaccharide binding	26	58	0.00538	1	1		GO:0005791	rough endoplasmic reticulum	35	69	5.9e-05	0.00264358	0.081951
GO:0030433	ubiquitin-dependent ERAD pathway	36	70	3.6e-05	0.013194	0.422208		GO:0016722	oxidoreductase activity, oxidizing metal ions	9	14	0.00549	1	1		GO:0030133	transport vesicle	120	315	7.1e-05	0.00308184	0.098619
GO:0090101	negative regulation of transmembrane receptor protein serine/threonine kinase signaling pathway	47	99	3.8e-05	0.013505	0.445664		GO:0003774	motor activity	50	128	0.00563	1	1		GO:0030176	integral component of endoplasmic reticulum membrane	56	128	0.00011	0.00463	0.15279
GO:0023051	regulation of signaling	947	3035	4.1e-05	0.0137385	0.480848		GO:0000213	tRNA-intron endonuclease activity	4	4	0.00646	1	1		GO:0008541	proteasome regulatory particle, lid subcomplex	7	7	0.00014	0.005556	0.19446
GO:0043067	regulation of programmed cell death	446	1352	4.1e-05	0.0137385	0.480848		GO:0004515	nicotinate-nucleotide adenylyltransferase activity	4	4	0.00646	1	1		GO:0031227	intrinsic component of endoplasmic reticulum membrane	57	132	0.00014	0.005556	0.19446
GO:0010646	regulation of cell communication	933	2989	4.5e-05	0.0141971	0.52776		GO:0070815	peptidyl-lysine 5-dioxygenase activity	4	4	0.00646	1	1		GO:0030867	rough endoplasmic reticulum membrane	15	23	0.00023	0.00887417	0.31947
GO:0006487	protein N-linked glycosylation	35	68	4.5e-05	0.0141971	0.52776		GO:0015171	amino acid transmembrane transporter activity	30	70	0.00649	1	1		GO:0034663	endoplasmic reticulum chaperone complex	9	11	0.00034	0.0127638	0.47226
GO:0071356	cellular response to tumor necrosis factor	98	245	4.6e-05	0.0141971	0.539488		GO:0051861	glycolipid binding	8	12	0.00652	1	1		GO:0030120	vesicle coat	25	49	0.00058	0.0210131	0.80562
GO:0007156	homophilic cell adhesion via plasma membrane adhesion molecules	63	144	4.9e-05	0.0147352	0.574672		GO:0004721	phosphoprotein phosphatase activity	61	163	0.00733	1	1		GO:0032580	Golgi cisterna membrane	34	73	0.00059	0.0210131	0.81951
GO:0035556	intracellular signal transduction	771	2443	5.6e-05	0.0164192	0.656768		GO:0002020	protease binding	45	115	0.00802	1	1		GO:0031090	organelle membrane	820	2668	0.00062	0.0215295	0.86118
GO:0036503	ERAD pathway	43	90	6.6e-05	0.0184297	0.774048		GO:0046873	metal ion transmembrane transporter activity	136	402	0.00869	1	1		GO:0031985	Golgi cisterna	41	94	0.00092	0.0303844	1
GO:0051650	establishment of vesicle localization	96	241	6.6e-05	0.0184297	0.774048		GO:0016758	transferase activity, transferring hexosyl groups	69	189	0.00882	1	1		GO:0031410	cytoplasmic vesicle	615	1976	0.00094	0.0303844	1
GO:0019752	carboxylic acid metabolic process	319	943	7.1e-05	0.0193648	0.832688		GO:0008324	cation transmembrane transporter activity	194	592	0.0092	1	1		GO:0008250	oligosaccharyltransferase complex	9	12	0.00101	0.0303844	1
GO:0008283	cell proliferation	568	1765	7.4e-05	0.0197244	0.867872		GO:0042578	phosphoric ester hydrolase activity	114	332	0.00945	1	1		GO:0099512	supramolecular fiber	257	776	0.00103	0.0303844	1
GO:0009966	regulation of signal transduction	855	2734	7.9e-05	0.0205892	0.926512		GO:0016791	phosphatase activity	86	243	0.00964	1	1		GO:0042470	melanosome	44	103	0.00103	0.0303844	1
GO:0032502	developmental process	1593	5280	9.2e-05	0.023456	1		GO:0008138	protein tyrosine/serine/threonine phosphatase activity	18	38	0.0098	1	1		GO:0048770	pigment granule	44	103	0.00103	0.0303844	1
GO:0048659	smooth muscle cell proliferation	51	113	9.5e-05	0.0237055	1		GO:0031418	L-ascorbic acid binding	11	20	0.01099	1	1		GO:0044322	endoplasmic reticulum quality control compartment	14	23	0.00104	0.0303844	1
GO:0090092	regulation of transmembrane receptor protein serine/threonine kinase signaling pathway	78	190	9.8e-05	0.0239447	1		GO:1904264	ubiquitin protein ligase activity involved in ERAD pathway	8	13	0.01275	1	1		GO:0097708	intracellular vesicle	615	1978	0.00105	0.0303844	1
GO:0048856	anatomical structure development	1485	4909	0.00011	0.0263282	1		GO:0022839	ion gated channel activity	19	42	0.01443	1	1		GO:0031982	vesicle	1150	3826	0.00133	0.0377014	1
GO:0051648	vesicle localization	99	253	0.00012	0.0270646	1		GO:0022891	substrate-specific transmembrane transporter activity	267	842	0.01522	1	1		GO:0099080	supramolecular complex	258	784	0.00149	0.0413922	1
GO:0044281	small molecule metabolic process	629	1977	0.00012	0.0270646	1		GO:0005506	iron ion binding	51	138	0.01721	1	1		GO:0099081	supramolecular polymer	257	783	0.00178	0.0484788	1
GO:0009887	animal organ morphogenesis	294	868	0.00012	0.0270646	1		GO:0070273	phosphatidylinositol-4-phosphate binding	11	21	0.01725	1	1		GO:0043034	costamere	11	17	0.00182	0.048484	1
GO:0006811	ion transport	462	1420	0.00013	0.0282341	1		GO:0016874	ligase activity	60	166	0.01727	1	1		GO:0022624	proteasome accessory complex	14	24	0.00185	0.048484	1
GO:0051094	positive regulation of developmental process	364	1097	0.00013	0.0282341	1		GO:0072509	divalent inorganic cation transmembrane transporter activity	59	163	0.01756	1	1
GO:0018279	protein N-linked glycosylation via asparagine	24	43	0.00014	0.028309	1		GO:0016757	transferase activity, transferring glycosyl groups	89	258	0.01759	1	1
GO:0010941	regulation of cell death	474	1461	0.00014	0.028309	1		GO:0042605	peptide antigen binding	9	16	0.01767	1	1
GO:0032354	response to follicle-stimulating hormone	12	16	0.00014	0.028309	1		GO:0015175	neutral amino acid transmembrane transporter activity	14	29	0.01792	1	1
GO:0006928	movement of cell or subcellular component	550	1715	0.00014	0.028309	1		GO:0016832	aldehyde-lyase activity	6	9	0.01904	1	1
GO:0034097	response to cytokine	290	857	0.00015	0.0283742	1		GO:0004812	aminoacyl-tRNA ligase activity	19	43	0.01912	1	1
GO:0051234	establishment of localization	1399	4617	0.00015	0.0283742	1		GO:0016706	oxidoreductase activity, acting on paired donors, with incorporation or reduction of molecular oxygen, 2-oxoglutarate as one donor, and incorporation of one atom each of oxygen into both donors	19	43	0.01912	1	1
GO:0071345	cellular response to cytokine stimulus	263	770	0.00015	0.0283742	1		GO:0015075	ion transmembrane transporter activity	249	786	0.01945	1	1
GO:0006812	cation transport	331	991	0.00015	0.0283742	1		GO:0022857	transmembrane transporter activity	288	917	0.01964	1	1
GO:0042981	regulation of apoptotic process	437	1340	0.00016	0.02932	1
GO:0007178	transmembrane receptor protein serine/threonine kinase signaling pathway	109	285	0.00016	0.02932	1
GO:0048660	regulation of smooth muscle cell proliferation	49	110	0.00019	0.0342818	1
GO:0006810	transport	1369	4519	0.0002	0.0355394	1
GO:0030970	retrograde protein transport, ER to cytosol	16	25	0.00021	0.0362188	1
GO:1903513	endoplasmic reticulum to cytosol transport	16	25	0.00021	0.0362188	1
GO:0018196	peptidyl-asparagine modification	24	44	0.00022	0.0373936	1
GO:0090287	regulation of cellular response to growth factor stimulus	89	227	0.00023	0.0385349	1
GO:0007399	nervous system development	644	2039	0.00024	0.0390933	1
GO:0006915	apoptotic process	541	1693	0.00024	0.0390933	1
GO:0033209	tumor necrosis factor-mediated signaling pathway	66	160	0.00027	0.0433775	1
GO:0055085	transmembrane transport	417	1282	0.00028	0.0437845	1
GO:0043648	dicarboxylic acid metabolic process	42	92	0.00028	0.0437845	1
GO:0006468	protein phosphorylation	553	1736	0.00029	0.0441704	1
GO:0010243	response to organonitrogen compound	279	829	0.00029	0.0441704	1
GO:0034612	response to tumor necrosis factor	100	262	0.00031	0.0466113	1
GO:1905039	carboxylic acid transmembrane transport	44	98	0.00032	0.0475058	1
GO:0012501	programmed cell death	568	1789	0.00033	0.0482918	1
GO:0030512	negative regulation of transforming growth factor beta receptor signaling pathway	31	63	0.00034	0.0482918	1
GO:0035295	tube development	179	509	0.00035	0.0482918	1
GO:0006983	ER overload response	9	11	0.00035	0.0482918	1
GO:0060601	lateral sprouting from an epithelium	9	11	0.00035	0.0482918	1
GO:0071372	cellular response to follicle-stimulating hormone stimulus	9	11	0.00035	0.0482918	1

## Sheet: Foglio2
		response to ER stress	10.9586			1.1e-11
		cellular response to unfolded protein	10.1308			7.4e-11
		response to unfolded protein	9.74473			1.8e-10
		cellular response to topologically incorrect protein	9.23657			5.8e-10
		ER unfolded protein response	9.06048			8.7e-10
		retrograde vesicle-mediated transport, Golgi to ER	8.85387			1.4e-09
		response to topologically incorrect protein	8.76955			1.7e-09
		Golgi vesicle transport	8.63827			2.3e-09
		ER to Golgi vesicle-mediated transport	8.4437			3.6e-09
		response to organic substance	7			1e-07
		ion binding	5.60206			2.5e-06
		calcium ion binding	4.33724			4.6e-05
		oligosaccharyl transferase activity	4.05552			8.8e-05
		microtubule motor activity	3.92082			0.00012
		anion binding	3.58503			0.00026
		dolichyl-diphosphooligosacch-prot glycotransf	3.55284			0.00028
		small molecule binding	3.26761			0.00054
		transmembrane receptor protein tk activity	3.14874			0.00071
		growth factor binding	3.11919			0.00076
		protein disulfide isomerase activity	3.08619			0.00082
		ER	19.6198			2.4e-20
		ER part	17.6778			2.1e-18
		ER subcompartment	15.1192			7.6e-16
		organelle subcompartment	15.041			9.1e-16
		ER membrane	14.8861			1.3e-15
		nuclear outer membrane-ER membrane network	14.5376			2.9e-15
		endomembrane system	11.9208			1.2e-12
		cytoplasmic part	7.82391			1.5e-08
		Golgi-associated vesicle	7.42022			3.8e-08
		cytoplasm	7.40894			3.9e-08
